# Supplementary material for: In situ investigation of the formation mechanism of α-Bi2Rh nanoparticles in polyol reductions
Source: Royal Society of Chemistry journal article supplement (doi:10.1039/d2dt02273g), 2022-01-01
Supplement: d2dt02273g1.pdf [file d2dt02273g1.pdf]

## In situ Investigation of the Formation Mechanism of $\alpha$ -Bi<sub>2</sub>Rh Nanoparticles in Polyol Reductions

Matthias Smuda, Jonas Ströh, Nicole Pienack, Azat Khadiev, Huayna Terraschke, Michael Ruck, and Thomas Doert\*

### Supporting Information

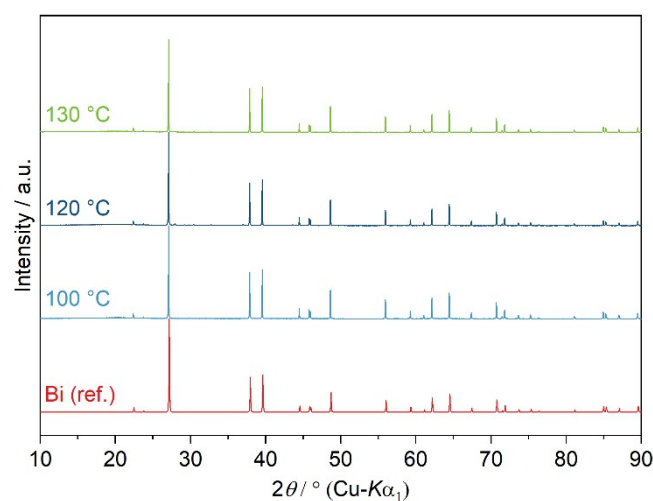

**Figure S1.** PXRD patterns of solid reaction products obtained by heating the supernatant obtained from the reaction of  $\text{Bi}(\text{NO}_3)_3$  and  $\text{Rh}_2(\text{OAc})_4$  with added NaOH to 250 °C for 10 min. Bi (ref.) is the calculated diffraction pattern based on the crystal structure of Bi (ICSD entry CSD-64703).

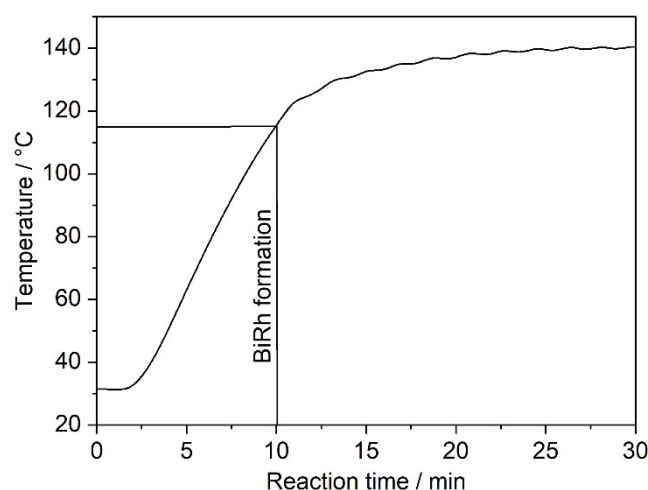

**Figure S2.** Temperature course throughout the reaction with an approximate suggestion of the BiRh formation point.

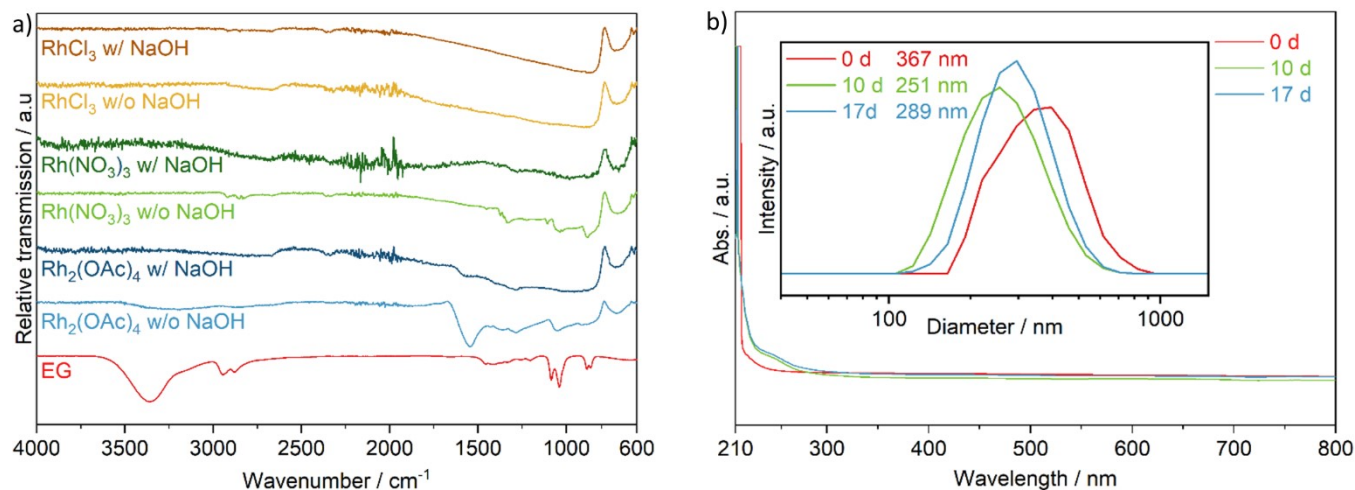

**Figure S3.** a) FT-IR spectra of the final products obtained by reacting Bi(NO<sub>3</sub>)<sub>3</sub> with different rhodium salts under neutral and alkaline conditions. b) UV-Vis spectrum and DLS measurement (inset) of Bi<sub>2</sub>Rh re-dispersed in EG (0.04 mg/mL) after dispersion (0 d), 10 days and 17 days.

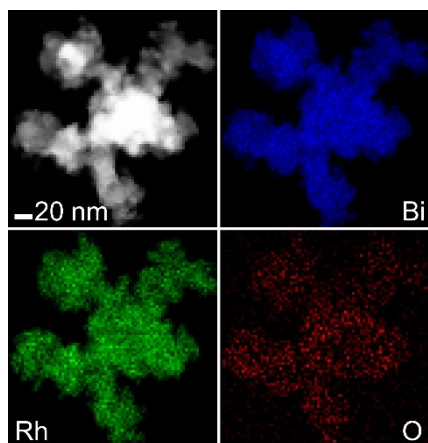

**Figure S4.** Elemental mapping of an intermediate obtained from the reaction of Bi(NO<sub>3</sub>)<sub>3</sub> and Rh<sub>2</sub>(OAc)<sub>4</sub> with added NaOH at 130 °C after 10 min reaction time.

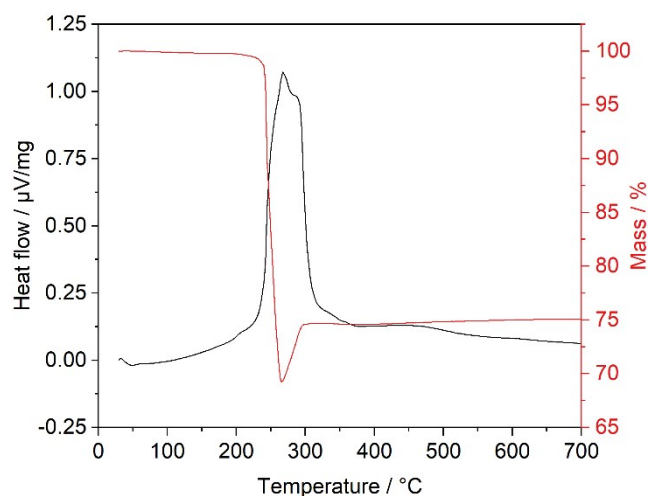

**Figure S5.** DTA-TG measurement of Bi<sub>3</sub>(C<sub>2</sub>H<sub>4</sub>O<sub>2</sub>)<sub>4</sub>(NO<sub>3</sub>).

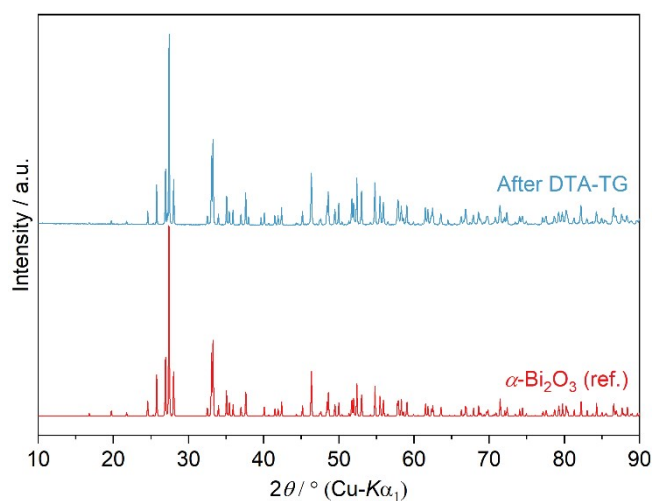

**Figure S6.** Powder pattern of the powder obtained after combustion of the bismuth glycolate during DTA-TG.

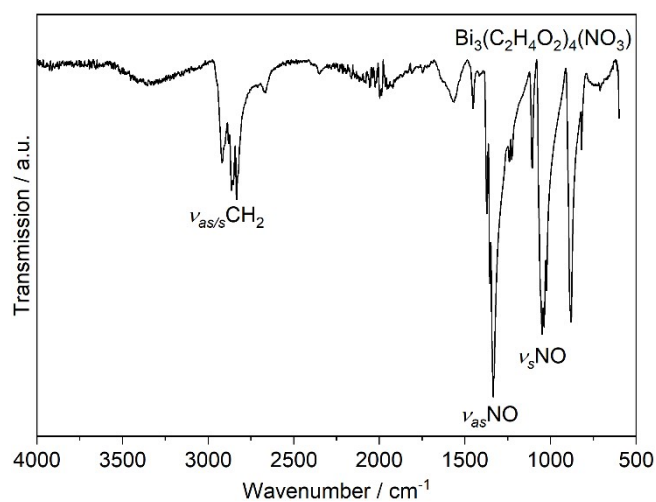

**Figure S7.** FT-IR spectrum of the obtained bismuth glycolate from pure  $\text{Bi}(\text{NO}_3)_3$  solution.

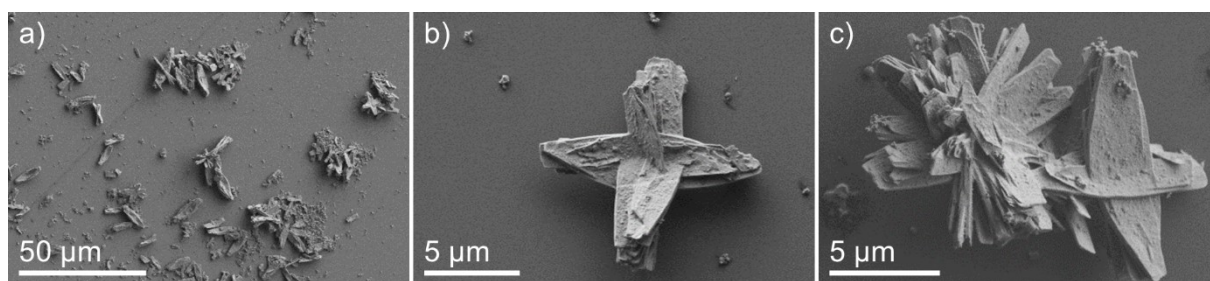

**Figure S8.** SEM images of particles obtained from the reaction of  $\text{Bi}(\text{NO}_3)_3$  and  $\text{Rh}(\text{NO}_3)_3$  in EG at 160 °C.

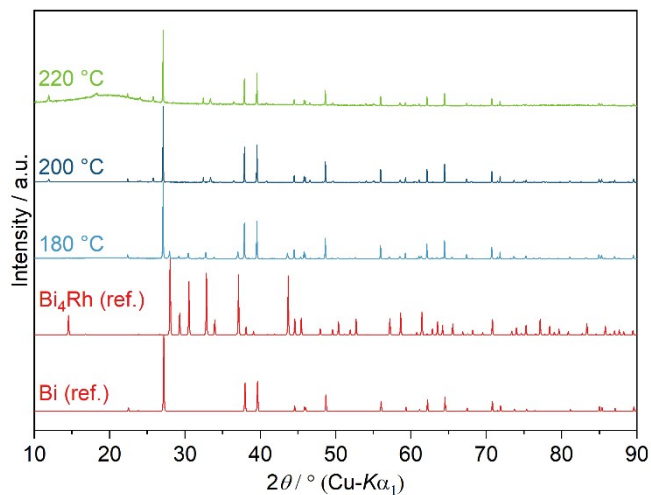

**Figure S9.** PXRD patterns of solid reaction products obtained by reacting the supernatant obtained from the reaction of  $\text{Bi}(\text{NO}_3)_3$  and  $\text{RhCl}_3$  at 250 °C for 10 min. Bi (ref.) and  $\text{Bi}_4\text{Rh}$  (ref.) are the calculated diffraction patterns based on the crystal structure of Bi (ICSD entry CSD-64703) and  $\text{Bi}_4\text{Rh}$  (ICSD entry CSD-58854), respectively

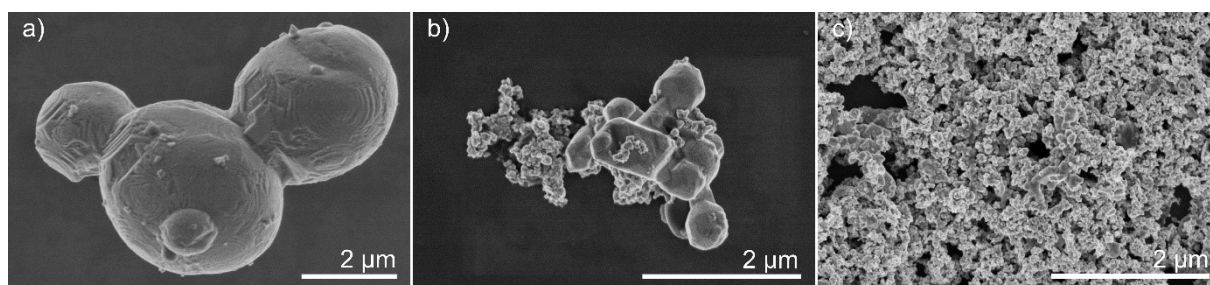

**Figure S10.** SEM images of particles obtained from the reaction of  $\text{Bi}(\text{NO}_3)_3$  and  $\text{RhCl}_3$  with added NaOH at 240 °C displaying spherical bismuth particles (a), a mixture of  $\text{Bi}_2\text{Rh}$ , rhodium and bismuth particles (b) and rhodium particles (c).
